# Supplementary material for: Fabrication and assembly of supercapacitors based on Ni-based MOFs and their derivative materials for enhancing their electrochemical performances
Source: Royal Society of Chemistry journal article supplement (doi:10.1039/d4nr02277g), 2024-01-01
Supplement: d4nr02277g1.pdf [file d4nr02277g1.pdf]

# Fabrication and assembly of supercapacitors based on Ni-based MOF and their derivative materials for enhancing electrochemical performances

Wen-Ze Li,<sup>a</sup> Ying Yang,<sup>a</sup> Xiao-Sa Zhang,<sup>a</sup> Yu Liu,<sup>a</sup> and Jian Luan<sup>\*a</sup>

<sup>a</sup> College of Science, Shenyang University of Chemical Technology, Shenyang, 110142, P. R. China

E-mail: [2010044@stu.neu.edu.cn](mailto:2010044@stu.neu.edu.cn) (J. Luan)

Table S1  $R_s$  and  $R_{ct}$  after EIS fitting of Ni-MOF-b-based materials.

| Material       | $R_s$     | $R_{ct}$ |
|----------------|-----------|----------|
| Ni-MOF@C-a6-3  | 0.096299  | 1.738    |
| Ni-MOF@C-a8-3  | 0.089375  | 1.75     |
| Ni-MOF@C-a10-3 | 0.0738682 | 1.78     |
| Ni-MOF@M-a4    | 0.062196  | 2.153    |

**Table S2** Power density and energy density of electrode Ni-MOF-a-based materials at different current densities.

| <b>Ni-MOF@C-a6-3</b>  |        |         |         |         |         |         |       |
|-----------------------|--------|---------|---------|---------|---------|---------|-------|
| Current density (A/g) | 0.5    | 1       | 2       | 5       | 10      | 15      | 20    |
| P (W/kg)              | 450.13 | 899.71  | 1800    | 4500    | 9000    | 13520   | 18000 |
| E (Wh/kg)             | 17.63  | 15.57   | 10.25   | 7.25    | 4.25    | 3.38    | 2     |
| <b>Ni-MOF@C-a8-3</b>  |        |         |         |         |         |         |       |
| Current density (A/g) | 0.5    | 1       | 2       | 5       | 10      | 15      | 20    |
| P (W/kg)              | 465.92 | 884.68  | 1818.1  | 4725    | 9000    | 13516.4 | 17640 |
| E (Wh/kg)             | 40.25  | 27.72   | 20.1    | 10.5    | 6.25    | 4.13    | 2.45  |
| <b>Ni-MOF@C-a10-3</b> |        |         |         |         |         |         |       |
| Current density (A/g) | 0.5    | 1       | 2       | 5       | 10      | 15      | 20    |
| P (W/kg)              | 320.97 | 652.54  | 1280.41 | 3232.87 | 6582.86 | 9592.94 | 12800 |
| E (Wh/kg)             | 11.02  | 10.35   | 10.35   | 9.07    | 6.4     | 4.53    | 3.2   |
| <b>Ni-MOF@M-a4</b>    |        |         |         |         |         |         |       |
| Current density (A/g) | 0.5    | 1       | 2       | 5       | 10      | 15      | 20    |
| P (W/kg)              | 501.37 | 1002.07 | 2016.32 | 5914.29 | 10080   | 15120   | 20160 |
| E (Wh/kg)             | 79.94  | 74.71   | 49.96   | 1.15    | 0.84    | 0.84    | 0.56  |

**Table S3**  $R_s$  and  $R_{ct}$  after EIS fitting of Ni-MOF-b-based materials.

| <b>Material</b>       | <b><math>R_s</math></b> | <b><math>R_{ct}</math></b> |
|-----------------------|-------------------------|----------------------------|
| <b>Ni-MOF@C-b6-3</b>  | 0.95188                 | 1.636                      |
| <b>Ni-MOF@C-b8-3</b>  | 0.078927                | 1.733                      |
| <b>Ni-MOF@C-b10-3</b> | 1.409                   | 1.266                      |
| <b>Ni-MOF@M-b4</b>    | 0.091276                | 1.243                      |

**Table S4** Power density and energy density of electrode Ni-MOF-b-based materials at different current densities.

| <b>Ni-MOF@C-b6-3</b>  |        |        |         |         |         |         |         |
|-----------------------|--------|--------|---------|---------|---------|---------|---------|
| Current density (A/g) | 0.5    | 1      | 2       | 5       | 10      | 15      | 20      |
| P (W/kg)              | 618.38 | 641.44 | 2257.32 | 5621.2  | 11108.6 | 16662.9 | 22230   |
| E (Wh/kg)             | 40.83  | 42.21  | 23.89   | 12.96   | 8.64    | 6.48    | 4.94    |
| <b>Ni-MOF@C-b8-3</b>  |        |        |         |         |         |         |         |
| Current density (A/g) | 0.5    | 1      | 2       | 5       | 10      | 15      | 20      |
| P (W/kg)              | 405.04 | 809.83 | 1620    | 4050.99 | 7179.43 | 12155.3 | 16200   |
| E (Wh/kg)             | 12.14  | 11.81  | 11.43   | 10.24   | 6.98    | 5.74    | 4.05    |
| <b>Ni-MOF@C-b10-3</b> |        |        |         |         |         |         |         |
| Current density (A/g) | 0.5    | 1      | 2       | 5       | 10      | 15      | 20      |
| P (W/kg)              | 405.12 | 810.17 | 1620.68 | 4050    | 8100    | 12171.4 | 16200   |
| E (Wh/kg)             | 12.3   | 12.22  | 11.93   | 10.8    | 9       | 7.1     | 5.4     |
| <b>Ni-MOF@M-b4</b>    |        |        |         |         |         |         |         |
| Current density (A/g) | 0.5    | 1      | 2       | 5       | 10      | 15      | 20      |
| P (W/kg)              | 252.43 | 493.7  | 979.67  | 2471.04 | 4897.5  | 7646.4  | 10417.5 |
| E (Wh/kg)             | 11.71  | 11.41  | 9.96    | 8.58    | 6.53    | 5.31    | 4.63    |

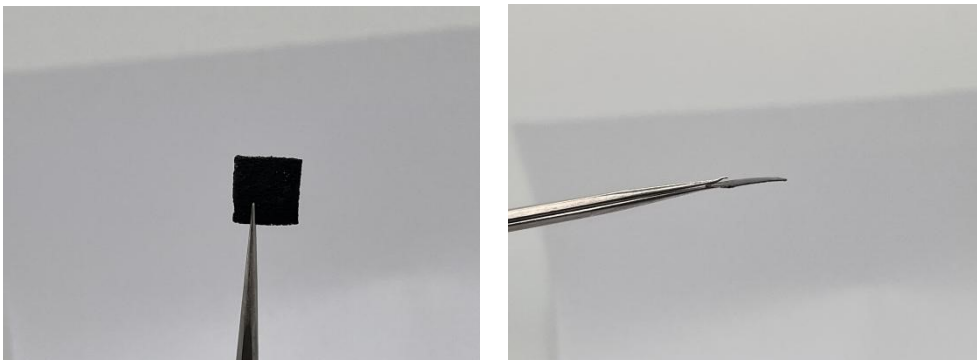

**Fig. S1** Post-pressing: Electrode materials loaded on nickel foam.

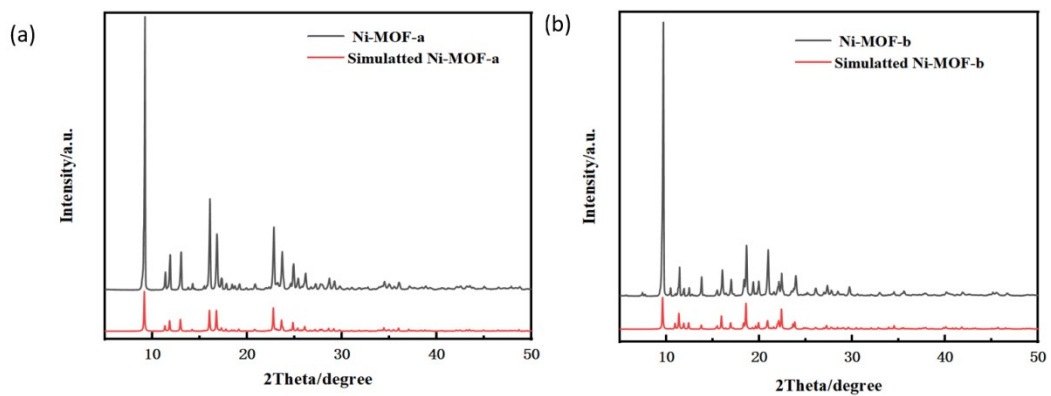

**Fig. S2** PXRD control plots of Ni-MOF-a (a) and Ni-MOF-b (b).

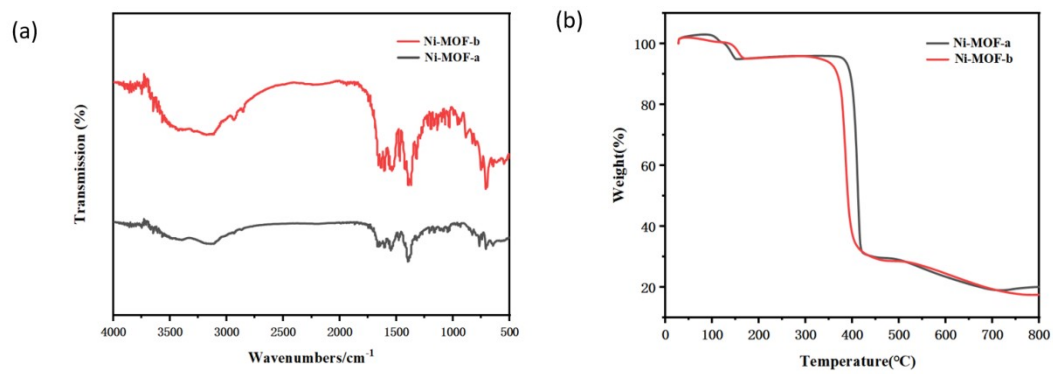

**Fig. S3** FTIR spectra (a) and TG curves (b) of Ni-MOF-a and Ni-MOF-b.

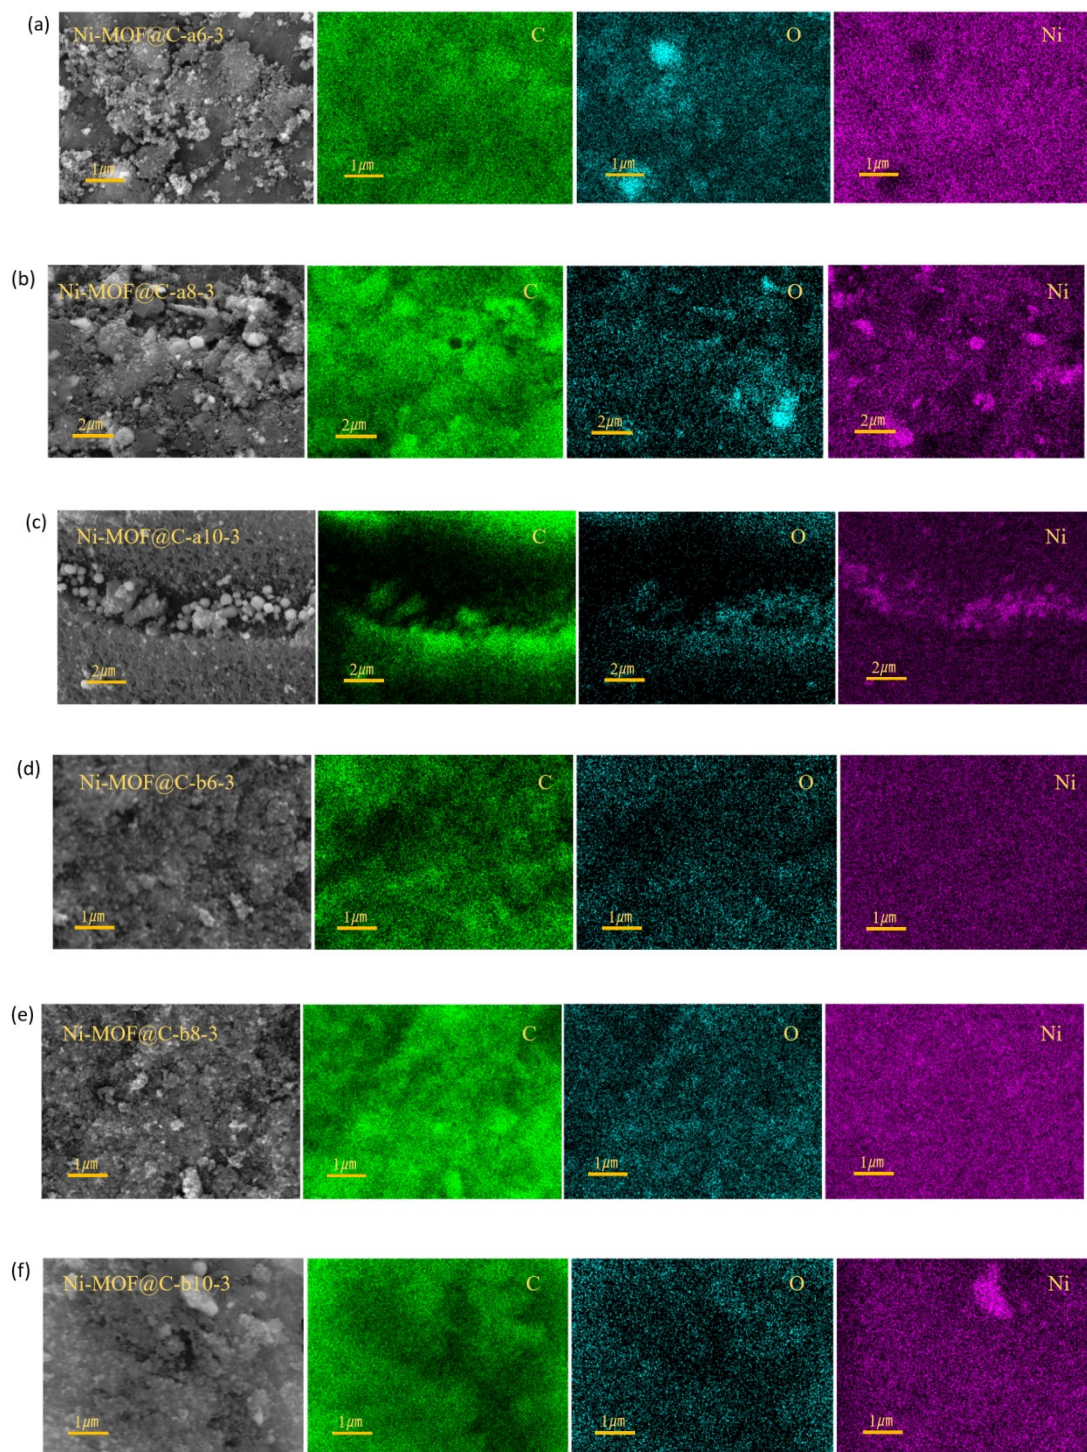

**Fig. S4** SEM and EDX of Ni-MOF@C-a6-3 (a), Ni-MOF@C-a8-3 (b), Ni-MOF@C-a10-3 (c) Ni-MOF@C-b6-3 (d), Ni-MOF@C-b8-3 (e), and Ni-MOF@C-b10-3 (f).



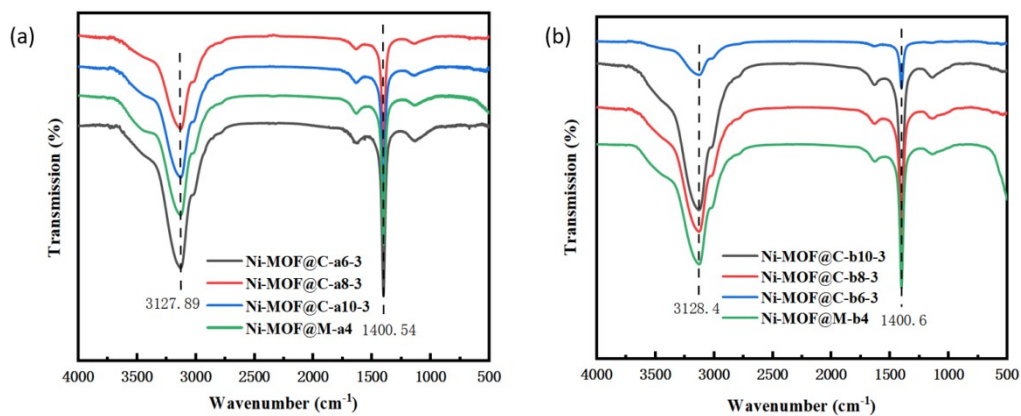

**Fig. S5** FTIR spectra of the Ni-MOF-a-based (a) and Ni-MOF-b-based (b) electrode materials.

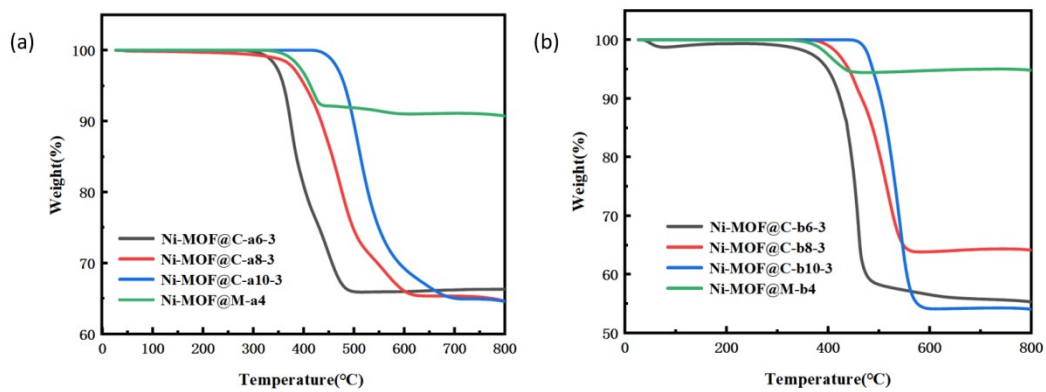

**Fig. S6** TG curves of the Ni-MOF-a-based (a) and Ni-MOF-b-based (b) electrode materials.

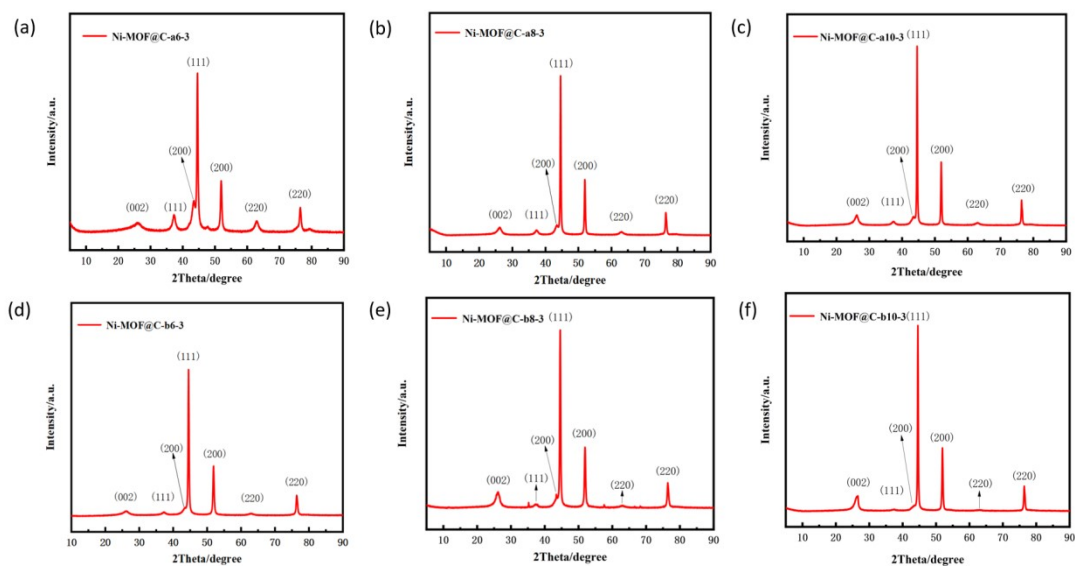

**Fig. S7** XRD patterns of Ni-MOF@C-a6-3 (a), Ni-MOF@C-a8-3 (b), Ni-MOF@C-a10-3 (c), Ni-MOF@C-b6-3 (d), Ni-MOF@C-b8-3 (e), and Ni-MOF@C-b10-3 (f).
